# Supplementary material for: TSSC1 is novel component of the endosomal retrieval machinery
Source: PubMed Central journal article supplement — Mol Biol Cell. 2016 Sep 15;27(18):2867–78. doi: 10.1091/mbc.E16-04-0209 (PMC5025273; doi:10.1091/mbc.e16-04-0209), 2016-09-15
Supplement: supp_E16-04-0209v1_CombinedSupMats.pdf [file supp_E16-04-0209v1_CombinedSupMats.pdf]

# Supplemental Materials

*Molecular Biology of the Cell*

Gershlick et al.

## Supplemental Data

### Supplementary Figure 1

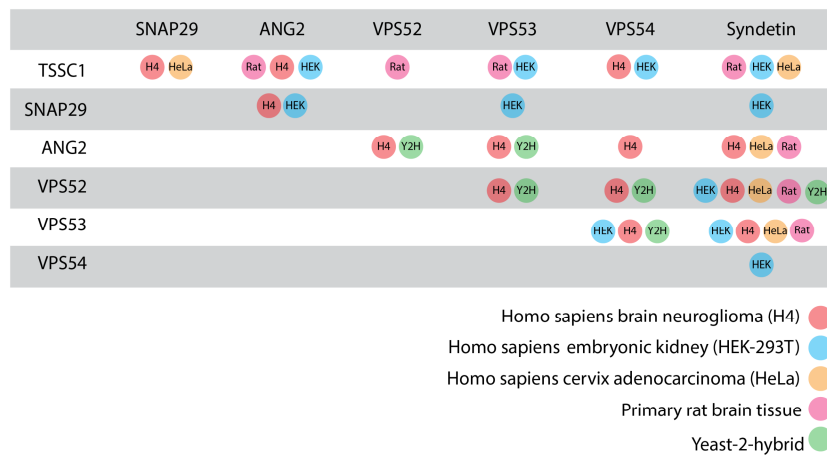

**Figure S1.** A map of experimentally demonstrated interactions for the GARP/EARP complex. Based on this manuscript, Schindler et al., 2015, and the BioGRID database.

## Supplementary Figure 2

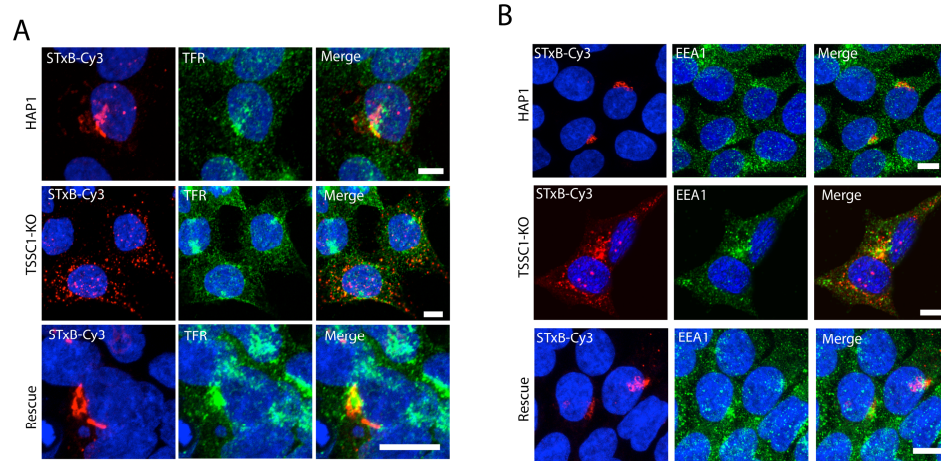

**Figure S2.** Live WT and TSSC1-KO HAP1 cells, and TSSC1-KO HAP1 cells rescued by stable expression of TSSC1-FOS, were incubated with Cy3-STxB for 1 hour, fixed, stained for the RE marker TfR (A), or the EE marker EEA1 (B), and examined by confocal fluorescence microscopy. Scale bar: 10  $\mu$ m

**Table S1.** Excel (.xls) file showing the results of the various mass spectrometry analyses performed in this study. The first sheet shows the tandem affinity purification of VPS51-FOS, VPS52-OSF, VPS53-OSF, and the negative control. The second sheet shows the results from the tandem affinity purification of Syndetin-OSF and TSSC1-FOS with the negative control. The third sheet shows the results from the VPS54-GFP GFP trap mass spectrometry experiment with the GFP negative control. All experiments were in the H4 cell line.
